# Supplementary material for: The Role of Dietary Energy and Macronutrients Intake in Prevalence of Irritable Bowel Syndromes
Source: Hindawi journal article supplement (doi:10.1155/2019/8967306), 2019-05-16
Supplement: f1 [file 8967306.f1.pdf]

**Table S1. Characteristics of included studies**

| First author | Publish year | Study year | Country     | Sample size | IBS diagnostic criteria | Prevalence (%) | Male prevalence (%) | Female prevalence (%) | Year of nutrition survey | Energy intake (kcal) | protein proportion (%) | Carbohydrates proportion (%) | Fat proportion (%) |
|--------------|--------------|------------|-------------|-------------|-------------------------|----------------|---------------------|-----------------------|--------------------------|----------------------|------------------------|------------------------------|--------------------|
| Agreus       | 1995         | 1988       | Sweden      | 1156        | Questionnaire           | 12.5           | N/A                 | N/A                   | 1981-1983                | 2975                 | 13.8                   | 50.8                         | 36.1               |
| Drossma      | 1993         | 1990       | USA         | 5430        | Rome I                  | 11.2           | 7.7                 | 14.5                  | 1988-1994                | N/A                  | 15.0                   | 49.8                         | 33.5               |
| Jones        | 1992         | 1987       | UK          | 1620        | Rome I                  | 21.6           | 18.7                | 24.3                  | 1981-1983                | 3155                 | 11.6                   | 51.2                         | 37.3               |
| Kennedy      | 1998         | 1994       | UK          | 3169        | Manning                 | 17.2           | 10.5                | 22.9                  | 1991-1993                | 3263                 | 12.0                   | 50.6                         | 37.7               |
| Aggarwal     | 2006         | 2003-2004  | UK          | 2299        | Rome II                 | 9.2            | N/A                 | N/A                   | 2001-2003                | 3444                 | 12.6                   | 53.0                         | 34.0               |
| Agreus       | 2000         | 1995       | Sweden      | 1139        | Manning                 | 21.9           | N/A                 | N/A                   | 1991-1993                | 3095                 | 13.6                   | 51.5                         | 36.1               |
|              |              |            |             |             | Rome I                  | 16.9           | N/A                 | N/A                   | 1991-1993                | 3095                 | 13.6                   | 51.5                         | 36.1               |
|              |              |            |             |             | Questionnaire           | 15.1           | N/A                 | N/A                   | 1991-1993                | 3095                 | 13.6                   | 51.5                         | 36.1               |
| Amra         | 2006         | 2002-2003  | Iran        | 4762        | Rome II                 | 7.1            | N/A                 | N/A                   | 2005                     | 2257                 | 13.4                   | 58.4                         | 31.5               |
| Andrews      | 2005         | 2001-2002  | USA         | 25986       | Rome II                 | 6.6            | N/A                 | N/A                   | 1999-2002                | N/A                  | 15.3                   | 50.7                         | 33.0               |
| Aro          | 2004         | 1998       | Sweden      | 2122        | Questionnaire           | 25.6           | N/A                 | N/A                   | 1991-1993                | 3095                 | 13.6                   | 51.5                         | 36.1               |
| Baretic      | 2002         | 1997       | Croatia     | 500         | Rome I                  | 28.2           | 19.8                | 36.8                  | 2012-2013                | 1822                 | 17.6                   | 45.5                         | 36.4               |
| Basaranoglu  | 2008         | 2003       | Turkey      | 707         | Rome II                 | 8.6            | N/A                 | N/A                   | N/A                      | N/A                  | N/A                    | N/A                          | N/A                |
| Boekema      | 2001         | 1996       | Netherlands | 428         | Manning                 | 5.8            | 3.2                 | 7.9                   | 1991-1993                | 3285                 | 13.1                   | 52.0                         | 35.7               |
| Bommelaer    | 2002         | 1999       | France      | 11131       | Rome I                  | 4              | 2.5                 | 5.3                   | 1991-1993                | 3537                 | 13.5                   | 44.8                         | 40.8               |
| Bommelaer    | 2004         | 2000       | France      | 8221        | Manning                 | 2.5            | 1.7                 | 3.1                   | 2001-2003                | 3643                 | 14.1                   | 45.6                         | 41.0               |
|              |              |            |             |             | Rome I                  | 2.1            | 1.4                 | 2.8                   | 2001-2003                | 3643                 | 14.1                   | 45.6                         | 41.0               |
|              |              |            |             |             | Rome II                 | 1.1            | 0.9                 | 1.3                   | 2001-2003                | 3643                 | 14.1                   | 45.6                         | 41.0               |
| Boyce        | 2000         | 1995       | Australia   | 2910        | Manning                 | 13.6           | 9.7                 | 17.2                  | 1991-1993                | 3516                 | 12.7                   | 47.0                         | 39.5               |
|              |              |            |             |             | Rome I                  | 4.4            | 2.2                 | 6.4                   | 1991-1993                | 3516                 | 12.7                   | 47.0                         | 39.5               |
|              |              |            |             |             | Rome II                 | 6.9            | 4.5                 | 9.2                   | 1991-1993                | 3516                 | 12.7                   | 47.0                         | 39.5               |
| Caballero    | 1999         | 1995       | Spain       | 264         | Rome I                  | 13.6           | 10.7                | 16.2                  | 1991-1993                | 3279                 | 13.7                   | 47.0                         | 39.1               |
| Campos       | 2001         | 1996       | Peru        | 300         | Manning                 | 26             | 26.5                | 25.6                  | N/A                      | N/A                  | N/A                    | N/A                          | N/A                |



|                  |      |           |              |       |               |      |      |      |           |      |      |      |      |
|------------------|------|-----------|--------------|-------|---------------|------|------|------|-----------|------|------|------|------|
| Jeong            | 2008 | 2000-2001 | South Korea  | 1417  | Rome II       | 2.2  | 1.8  | 2.6  | 2012      | 2237 | 11.4 | 59.0 | 15.0 |
| Karaman          | 2003 | 2001      | Turkey       | 1000  | Rome II       | 19.1 | N/A  | N/A  | N/A       | N/A  | N/A  | N/A  | N/A  |
| Khademolhosseini | 2011 | 2004      | Iran         | 1978  | Rome II       | 10.9 | 7.6  | 12.7 | 2005      | 2257 | 13.4 | 58.4 | 31.5 |
| Khoshkrood       | 2009 | 2006-2007 | Iran         | 18180 | Rome III      | 1.1  | 0.7  | 1.5  | 2005      | 2257 | 13.4 | 58.4 | 31.5 |
| Kumano           | 2004 | 2000      | Japan        | 4000  | Rome II       | 6.2  | 4.5  | 7.8  | 2000      | 1948 | 16.0 | 54.6 | 26.5 |
| Kwan             | 2002 | 2000      | Hong Kong    | 1000  | Rome II       | 6.6  | N/A  | N/A  | N/A       | N/A  | N/A  | N/A  | N/A  |
| Lau              | 2002 | 1997      | Hong Kong    | 1298  | Rome II       | 3.7  | 3.6  | 3.8  | N/A       | N/A  | N/A  | N/A  | N/A  |
| Lee              | 2009 | 2004      | Hong Kong    | 2005  | Rome III      | 5.4  | 4.6  | 6.2  | N/A       | N/A  | N/A  | N/A  | N/A  |
| Lee              | 2009 | 2005-2006 | South Korea  | 1443  | Rome II       | 9.5  | N/A  | N/A  | 2012      | 2237 | 11.4 | 59.0 | 15.0 |
| Li               | 2003 | 2001      | Canada       | 437   | Rome II       | 25.2 | 16.5 | 31   | 1990-1992 | 3017 | 15.4 | 51.0 | 36.0 |
| Lydiard          | 1994 | 1980-1984 | USA          | 13537 | Questionnaire | 1.1  | N/A  | N/A  | 1988-1994 | N/A  | 15.0 | 49.8 | 33.5 |
| Masud            | 2001 | 1997      | Bangladesh   | 2426  | Rome I        | 8.5  | 5.8  | 10.7 | 1995-1996 | 1977 | 7.2  | 86.2 | 6.6  |
|                  |      |           |              |       | Questionnaire | 24.4 | 20.6 | 27.7 | 1995-1996 | 1977 | 7.2  | 86.2 | 6.6  |
| Mearin           | 2001 | 2000      | Spain        | 2000  | Questionnaire | 14.1 | 8.6  | 19.3 | 2001-2003 | 3405 | 14.3 | 45.9 | 40.0 |
| Nicholl          | 2008 | 2003      | UK           | 6094  | Rome II       | 13.8 | N/A  | N/A  | 2001-2003 | 3444 | 12.6 | 53.0 | 34.0 |
| Okeke            | 2009 | 2004      | Nigeria      | 443   | Rome II       | 31.6 | 35.2 | 28.3 | N/A       | N/A  | N/A  | N/A  | N/A  |
| Olafsdottir      | 2005 | 2000      | Iceland      | 1336  | Manning       | 30.9 | 25.1 | 35.7 | N/A       | N/A  | N/A  | N/A  | N/A  |
| Osterberg        | 2000 | 1995      | Sweden       | 2707  | Rome I        | 10.6 | 7.4  | 13.3 | 1991-1993 | 3095 | 13.6 | 51.5 | 36.1 |
| Pan              | 2000 | 1996      | China        | 2486  | Manning       | 8.7  | N/A  | N/A  | 1993      | 2412 | 11.9 | 64.5 | 23.1 |
|                  |      |           |              |       | Rome I        | 1.1  | N/A  | N/A  | 1993      | 2412 | 11.9 | 64.5 | 23.1 |
| Papatheoridis    | 2005 | 2000      | Greece       | 700   | Questionnaire | 21.4 | 14.3 | 27.8 | 2001-2003 | 3682 | 12.5 | 51.3 | 37.6 |
| Perveen          | 2009 | 2004-2005 | Bangladesh   | 1503  | Rome II       | 7.7  | 6.8  | 8.6  | 1995-1996 | 1977 | 7.2  | 86.2 | 6.6  |
| Rajendra         | 2004 | 1999      | Malaysia     | 949   | Rome II       | 15.6 | 6.8  | 8.6  | 2003      | 1606 | 14.0 | 59.0 | 27.0 |
| Reshetnikov      | 2009 | 2004      | Russia       | 1040  | Rome I        | 19   | 12.2 | 25.2 | 2002-2005 | 2556 | 17.2 | 46.0 | 36.8 |
| Saito            | 2000 | 1996      | USA          | 643   | Manning       | 13.7 | 11.4 | 15.7 | 1988-1994 | N/A  | 15.0 | 49.8 | 33.5 |
|                  |      |           |              |       | Rome I        | 7.6  | 6.2  | 8.9  | 1988-1994 | N/A  | 15.0 | 49.8 | 33.5 |
| Segal            | 1984 | 1979      | South Africa | 332   | Questionnaire | 8.1  | N/A  | N/A  | 2002      | 2038 | 14.4 | 60.5 | 25.1 |

|           |      |           |           |       |               |      |      |      |           |      |      |      |      |
|-----------|------|-----------|-----------|-------|---------------|------|------|------|-----------|------|------|------|------|
| Soares    | 2005 | 2000      | Brazil    | 183   | Rome II       | 16.9 | 10.3 | 20   | 2008-2009 | 1902 | 17.0 | 56.0 | 27.0 |
| Sperber   | 2007 | 2002      | Israel    | 981   | Rome II       | 2.9  | 1.8  | 3.7  | 2002      | 1603 | 15.2 | 54.0 | 30.8 |
|           |      |           |           |       | Rome III      | 11.4 | 9.5  | 13   | 2002      | 1603 | 15.2 | 54.0 | 30.8 |
| Talley    | 1992 | 1988      | USA       | 835   | Manning       | 16.8 | N/A  | N/A  | 1988-1994 | N/A  | 15.0 | 49.8 | 33.5 |
|           |      |           |           |       | Rome I        | 6.9  | N/A  | N/A  | 1988-1994 | N/A  | 15.0 | 49.8 | 33.5 |
| Talley    | 1994 | 1989      | USA       | 919   | Manning       | 14.1 | 9.4  | 18.4 | 1988-1994 | N/A  | 15.0 | 49.8 | 33.5 |
| Talley    | 1995 | 1988-1993 | USA       | 3022  | Manning       | 17.7 | N/A  | N/A  | 1988-1994 | N/A  | 15.0 | 49.8 | 33.5 |
| Talley    | 1995 | 1990      | Australia | 99    | Manning       | 17.2 | N/A  | N/A  | 1991-1993 | 3516 | 12.7 | 47.0 | 39.5 |
| Talley    | 1997 | 1995      | Australia | 730   | Manning       | 13.2 | N/A  | N/A  | 1991-1993 | 3516 | 12.7 | 47.0 | 39.5 |
|           |      |           |           |       | Rome I        | 12.3 | 6.9  | 17   | 1991-1993 | 3516 | 12.7 | 47.0 | 39.5 |
| Thompson  | 2002 | 1998      | Canada    | 1149  | Rome I        | 13.5 | 8.5  | 18.2 | 1990-1992 | 3017 | 15.4 | 51.0 | 36.0 |
|           |      |           |           |       | Rome II       | 12.1 | 8.7  | 15.3 | 1990-1992 | 3017 | 15.4 | 51.0 | 36.0 |
| Usai      | 2010 | 2005      | Italy     | 1900  | Rome II       | 7.2  | 5.9  | 13.7 | 2001-2003 | 3670 | 12.9 | 49.7 | 37.7 |
| Walter    | 2010 | 2005      | Sweden    | 226   | Manning       | 15.5 | N/A  | N/A  | 2001-2003 | 3444 | 14.2 | 51.5 | 35.2 |
|           |      |           |           |       | Rome II       | 12.8 | N/A  | N/A  | 2001-2003 | 3444 | 14.2 | 51.5 | 35.2 |
| Wei       | 2001 | 2000      | China     | 2892  | Rome II       | 5.6  | 4.7  | 6.6  | 2000      | 2394 | 12.1 | 62.0 | 25.9 |
| Whitehead | 1982 | 1977      | USA       | 832   | Questionnaire | 8.1  | N/A  | N/A  | 1988-1994 | N/A  | 15.0 | 49.8 | 33.5 |
| Wilson    | 2004 | 1999      | UK        | 4807  | Rome II       | 8.3  | 6.6  | 14   | 1991-1993 | 3263 | 12.0 | 50.6 | 37.7 |
| Xiong     | 2004 | 2002      | China     | 4178  | Manning       | 11.5 | 9.7  | 13   | 2000      | 2394 | 12.1 | 62.0 | 25.9 |
|           |      |           |           |       | Rome II       | 5.7  | 5    | 6.3  | 2000      | 2394 | 12.1 | 62.0 | 25.9 |
| Yilmaz    | 2005 | 2003      | Turkey    | 3000  | Rome II       | 10.3 | 8    | 12.4 | N/A       | N/A  | N/A  | N/A  | N/A  |
| Zagari    | 2010 | 2000-2004 | Italy     | 1033  | Rome I        | 7.1  | N/A  | N/A  | 2001-2003 | 3670 | 12.9 | 49.7 | 37.7 |
| Zhao      | 2010 | 2007-2008 | China     | 16078 | Rome II       | 4.6  | 4.1  | 5    | 2006      | 2344 | 12.0 | 58.0 | 30.0 |
| Buscail   | 2017 | 2013      | France    | 41682 | Rome III      | 5.4  | 4.8  | 5.4  | 2006-2007 | 2273 | 14.1 | 57.0 | 28.9 |
| Lee       | 2014 | 2009      | Korea     | 1362  | Rome II       | 12   | N/A  | N/A  | 2012      | 2237 | 11.4 | 59.0 | 15.0 |
| Mansouri  | 2017 | 2009      | Iran      | 1850  | Rome II       | 21.6 | 15.9 | 27.1 | 2005      | 2257 | 13.4 | 58.4 | 31.5 |
| Rasmussen | 2015 | 2010      | Denmark   | 47174 | Rome III      | 10.5 | 7.9  | 12.8 | 2003-2008 | 2125 | 16.4 | 49.7 | 33.9 |

|                |      |           |            |       |               |      |      |      |           |      |      |      |      |
|----------------|------|-----------|------------|-------|---------------|------|------|------|-----------|------|------|------|------|
| Satake         | 2015 | 2013      | Japan      | 993   | Rome III      | 6.1  | 5.5  | 6.5  | 2013      | 1887 | 14.7 | 55.3 | 25.9 |
| Lopez          | 2012 | 2005      | Mexico     | 500   | Rome II       | 16   | 9.2  | 20.3 | N/A       | N/A  | N/A  | N/A  | N/A  |
| Arasteh        | 2018 | 2013      | Iran       | 9163  | Rome IV       | 11.6 | 7.6  | 15.1 | 2010      | 1956 | 13.4 | 52.8 | 33.8 |
| Choung         | 2015 | 2009      | USA        | 3202  | Questionnaire | 13.6 | N/A  | N/A  | 2007-2010 | N/A  | 15.6 | 49.5 | 33.1 |
| Siah           | 2016 | 2011      | Singapore  | 297   | Rome III      | 20.9 | 18.6 | 22.3 | 2010      | 2624 | 15.3 | 52.1 | 31.4 |
| Krogsgaard     | 2016 | 2010      | Denmark    | 5986  | Rome III      | 15.4 | N/A  | N/A  | 2003-2008 | 2125 | 16.4 | 49.7 | 33.9 |
|                |      | 2011      |            | 3750  |               | 17   | N/A  | N/A  | 2003-2008 | 2125 | 16.4 | 49.7 | 33.9 |
|                |      | 2013      |            | 2781  |               | 19.6 | N/A  | N/A  | 2003-2008 | 2125 | 16.4 | 49.7 | 33.9 |
| Lee            | 2013 | 2008      | Malaysia   | 221   | Rome III      | 10.9 | 10.6 | 11.1 | 2003      | 1606 | 14.0 | 59.0 | 27.0 |
| Cabrera        | 2016 | 2016      | Colombia   | 1207  | Questionnaire | 8.9  | N/A  | N/A  | N/A       | N/A  | N/A  | N/A  | N/A  |
| Guo            | 2014 | 2011      | Taiwan     | 1096  | Rome III      | 19.4 | 17.7 | 25.5 | N/A       | N/A  | N/A  | N/A  | N/A  |
| krogsgaard     | 2013 | 2010      | Denmark    | 6112  | Rome III      | 16   | 11.4 | 19.1 | 2003-2008 | 2125 | 16.4 | 49.7 | 33.9 |
| Chirila        | 2017 | 2012      | Romania    | 158   | Rome          | 15.2 | N/A  | N/A  | N/A       | N/A  | N/A  | N/A  | N/A  |
| Lee            | 2016 | 2005-2006 | Korea      | 3429  | Rome II       | 10.9 | 10.5 | 11.3 | 2012      | 2237 | 11.4 | 59.0 | 15.0 |
| Perveen        | 2014 | 2011      | Bangladesh | 3000  | Rome III      | 12.9 | 12.5 | 13.3 | 1995-1996 | 1977 | 7.2  | 86.2 | 6.6  |
| Husain         | 2012 | 2007      | Romania    | 1682  | Rome II       | 14.6 | N/A  | N/A  | N/A       | N/A  | N/A  | N/A  | N/A  |
| leelakusolvong | 2012 | 2003-2004 | Thailand   | 3120  | Rome I        | 14.3 | N/A  | N/A  | 2004-2005 | 1408 | 15.8 | 61.4 | 22.8 |
| Lankarani      | 2017 | 2012      | Iran       | 1038  | Rome III      | 17.4 | 15.4 | 19.1 | 2010      | 1956 | 13.4 | 52.8 | 33.8 |
| Ghoshal        | 2016 | 2010-2012 | India      | 2774  | Rome III      | 2.7  | 2.9  | 2.5  | 2004      | 1834 | 10.8 | 78.6 | 10.6 |
| Kumar          | 2016 | 2011      | Bangladesh | 3500  | Rome III      | 7.2  | N/A  | N/A  | 1995-1996 | 1977 | 7.2  | 86.2 | 6.6  |
| Koloski        | 2015 | 2011      | Australia  | 767   | Rome III      | 17   | N/A  | N/A  | 2011-2012 | 2304 | 17.9 | 44.9 | 30.5 |
| Matsumoto      | 2013 | 2010      | Japan      | 10000 | Rome III      | 21.2 | 18.6 | 23.9 | 2010      | 1875 | 14.3 | 54.4 | 27.6 |
| Choung         | 2013 | 2009-2010 | USA        | 3515  | Rome III      | 19.4 | 13.2 | 24.7 | 2007-2010 | N/A  | 15.6 | 49.5 | 33.1 |
| Cai            | 2015 | 2010-2011 | China      | 2950  | Rome III      | 1.6  | N/A  | N/A  | 2011      | 2192 | 12.4 | 54.6 | 33.0 |
| Le Pluart      | 2015 | 2013      | France     | 35447 | Rome III      | 5.4  | 4.6  | 5.6  | 2006-2007 | 2273 | 14.1 | 57.0 | 28.9 |
| Long           | 2017 | 2010      | China      | 1999  | Rome III      | 5.9  | 6    | 5.7  | 2009      | 2273 | 12.7 | 31.2 | 56.1 |
| Ligaarden      | 2012 | 2001      | Norway     | 4621  | Rome II       | 8.4  | 6.2  | 10.1 | 2010-2011 | 2243 | 18.0 | 44.0 | 33.0 |

|             |      |           |           |       |               |      |      |      |           |      |      |      |      |
|-------------|------|-----------|-----------|-------|---------------|------|------|------|-----------|------|------|------|------|
| Miwa        | 2012 | 2010      | Japan     | 15000 | Rome III      | 14   | N/A  | N/A  | 2010      | 1875 | 14.3 | 54.4 | 27.6 |
| Dantoft     | 2017 | 2011-2015 | Denmark   | 7493  | Questionnaire | 11.6 | 7.6  | 14.9 | 2003-2008 | 2125 | 16.4 | 49.7 | 33.9 |
| Yun         | 2012 | 2005-2006 | Korea     | 3365  | Rome II       | 1.1  | N/A  | N/A  | 2012      | 2237 | 11.4 | 59.0 | 15.0 |
| Koloski     | 2012 | 2008      | Australia | 1002  | Rome II       | 8.2  | N/A  | N/A  | 2001-2003 | 3444 | 12.6 | 53.0 | 34.0 |
| Olafsdottir | 2012 | 1996      | Iceland   | 1340  | Questionnaire | 16.9 | N/A  | N/A  | N/A       | N/A  | N/A  | N/A  | N/A  |
|             |      | 2006      |           | 1180  |               | 17.2 | N/A  | N/A  | N/A       | N/A  | N/A  | N/A  | N/A  |
|             |      | 1988      | USA       | 3805  |               | 8.3  | N/A  | N/A  | 1988-1994 | N/A  | 15.0 | 49.8 | 33.5 |
|             |      | 2003      |           | 2914  |               | 11.4 | N/A  | N/A  | 1999-2002 | N/A  | 15.3 | 50.7 | 33.0 |
| Makharia    | 2011 | 2008-2009 | India     | 4767  | Rome III      | 4    | 3.2  | 4.8  | 2004      | 1834 | 10.8 | 78.6 | 10.6 |
| Almario     | 2016 | 2015      | USA       | 71813 | Rome III      | 2    | N/A  | N/A  | 2011-2014 | N/A  | 15.8 | 48.6 | 33.6 |
| Amieva      | 2014 | 2009      | Mexico    | 2186  | Rome III      | 7.6  | 4.7  | 9.5  | N/A       | N/A  | N/A  | N/A  | N/A  |
| Chang       | 2012 | 2005-2008 | Taiwan    | 4275  | Rome III      | 4.4  | N/A  | N/A  | N/A       | N/A  | N/A  | N/A  | N/A  |
| Chirila     | 2012 | 2007      | Romania   | 193   | Rome III      | 19.1 | 18.7 | 19.4 | N/A       | N/A  | N/A  | N/A  | N/A  |
| Gonzales    | 2012 | 2011      | Peru      | 200   | Rome III      | 15   | 11.8 | 16.9 | N/A       | N/A  | N/A  | N/A  | N/A  |
| Hayatbakhsh | 2013 | 2010-2011 | Iran      | 2259  | Rome III      | 4.4  | N/A  | N/A  | 2010      | 1956 | 13.4 | 52.8 | 33.8 |
| Iri         | 2017 | 2013-2014 | Iran      | 430   | Rome III      | 10.6 | 11.5 | 10   | 2010      | 1956 | 13.4 | 52.8 | 33.8 |
| Kanazawa    | 2016 | 2011      | Japan     | 30000 | Rome III      | 16.5 | 15.5 | 17.4 | 2011      | 1846 | 14.7 | 55.6 | 25.8 |
| Koloski     | 2017 | 2012      | Australia | 3576  | Rome III      | 25.5 | N/A  | N/A  | 2011-2012 | 2304 | 17.9 | 44.9 | 30.5 |
| Krogsgaard  | 2014 | 2013      | Denmark   | 2796  | Rome III      | 19.6 | N/A  | N/A  | 2003-2008 | 2125 | 16.4 | 49.7 | 33.9 |
| Liang       | 2015 | 2010      | China     | 1214  | Rome III      | 5.2  | N/A  | N/A  | 2009      | 2273 | 12.7 | 31.2 | 56.1 |
| Liu         | 2014 | 2009      | China     | 2773  | Rome III      | 6.5  | N/A  | N/A  | 2009      | 2273 | 12.7 | 31.2 | 56.1 |
| Palsson     | 2016 | 2011      | USA       | 1949  | Rome III      | 11.1 | N/A  | N/A  | 2011-2014 | N/A  | 15.8 | 48.6 | 33.6 |
|             |      |           |           |       | Rome IV       | 6.1  | N/A  | N/A  | 2011-2014 | N/A  | 15.8 | 48.6 | 33.6 |
|             |      |           | UK        | 1994  | Rome III      | 10.6 | N/A  | N/A  | 2008-2012 | 1861 | 16.5 | 45.7 | 32.9 |
|             |      |           |           |       | Rome IV       | 5.5  | N/A  | N/A  | 2008-2012 | 1861 | 16.5 | 45.7 | 32.9 |
|             |      |           | Canada    | 1988  | Rome III      | 11.7 | N/A  | N/A  | 1990-1992 | 3017 | 15.4 | 51.0 | 36.0 |
|             |      |           |           |       | Rome IV       | 5.8  | N/A  | N/A  | 1990-1992 | 3017 | 15.4 | 51.0 | 36.0 |

|            |      |           |           |       |               |      |     |     |           |      |      |      |      |
|------------|------|-----------|-----------|-------|---------------|------|-----|-----|-----------|------|------|------|------|
| Palsson    | 2014 | 2013      | USA       | 1216  | Rome III      | 7.5  | 6.2 | 8.7 | 2011-2014 | N/A  | 15.8 | 48.6 | 33.6 |
| Qumseya    | 2013 | 2008      | Palestine | 1352  | Rome III      | 30   | N/A | N/A | 1999-2000 | 2014 | 14.5 | 54.2 | 30.7 |
| Sugawara   | 2018 | 2013      | Japan     | 1002  | Rome III      | 5.9  | 5   | 6.5 | 2013      | 1887 | 14.7 | 55.3 | 25.9 |
| Torres     | 2018 | 2013      | France    | 36448 | Rome III      | 5.1  | 4.4 | 5.4 | 2006-2007 | 2273 | 14.1 | 57.0 | 28.9 |
| Kjellstrom | 2014 | 2000-2006 | Sweden    | 2293  | Questionnaire | 26.2 | 18  | 33  | 2001-2003 | 3444 | 14.2 | 51.5 | 35.2 |
